# Supplementary material
Source: PubMed Central journal article supplement (PMC4228789)
Supplement: NIHMS603751-supplement-2nd_Revised_Supplemental_Material.pdf [file NIHMS603751-supplement-2nd_Revised_Supplemental_Material.pdf]

## SUPPLEMENTAL MATERIAL

### A. MCT rat (PA)

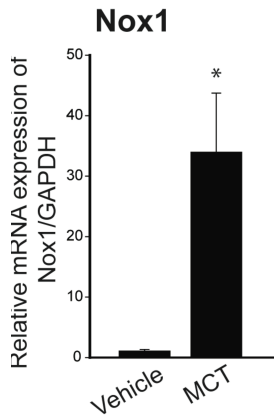

### B. Sugren/Hypoxia rat (PA)

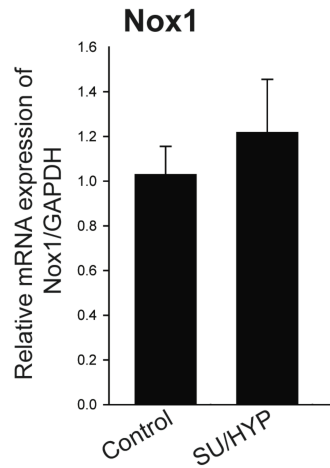

### C. FHR (PA)

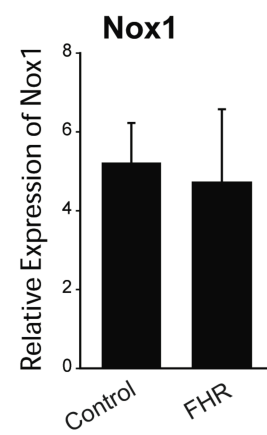

### D. Hypoxia mouse (lung)

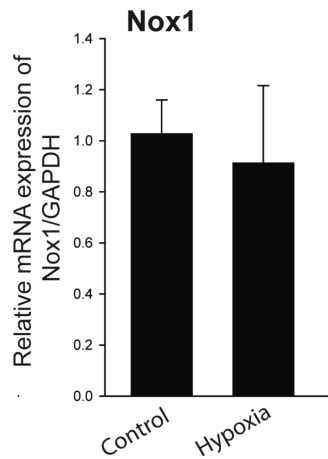

**Supplemental Figure I. Nox1 expression is increased only in MCT-treated rat hypertensive pulmonary arteries (PA).** Nox1 mRNA (measured by qRT-PCR ( $\Delta\Delta Ct$ ) normalized to GAPDH) is significantly increased in PA from 4week MCT-treated rats (**A**). In contrast, Nox1 expression is not increased in PA from SU/HYP treated rats (14week; **B**) or FHR (24week; **C**) relative to control or in hypoxic mouse lung (3week; **D**). \* Significantly different from Vehicle,  $p < 0.05$  ( $n = 4-5$ ).

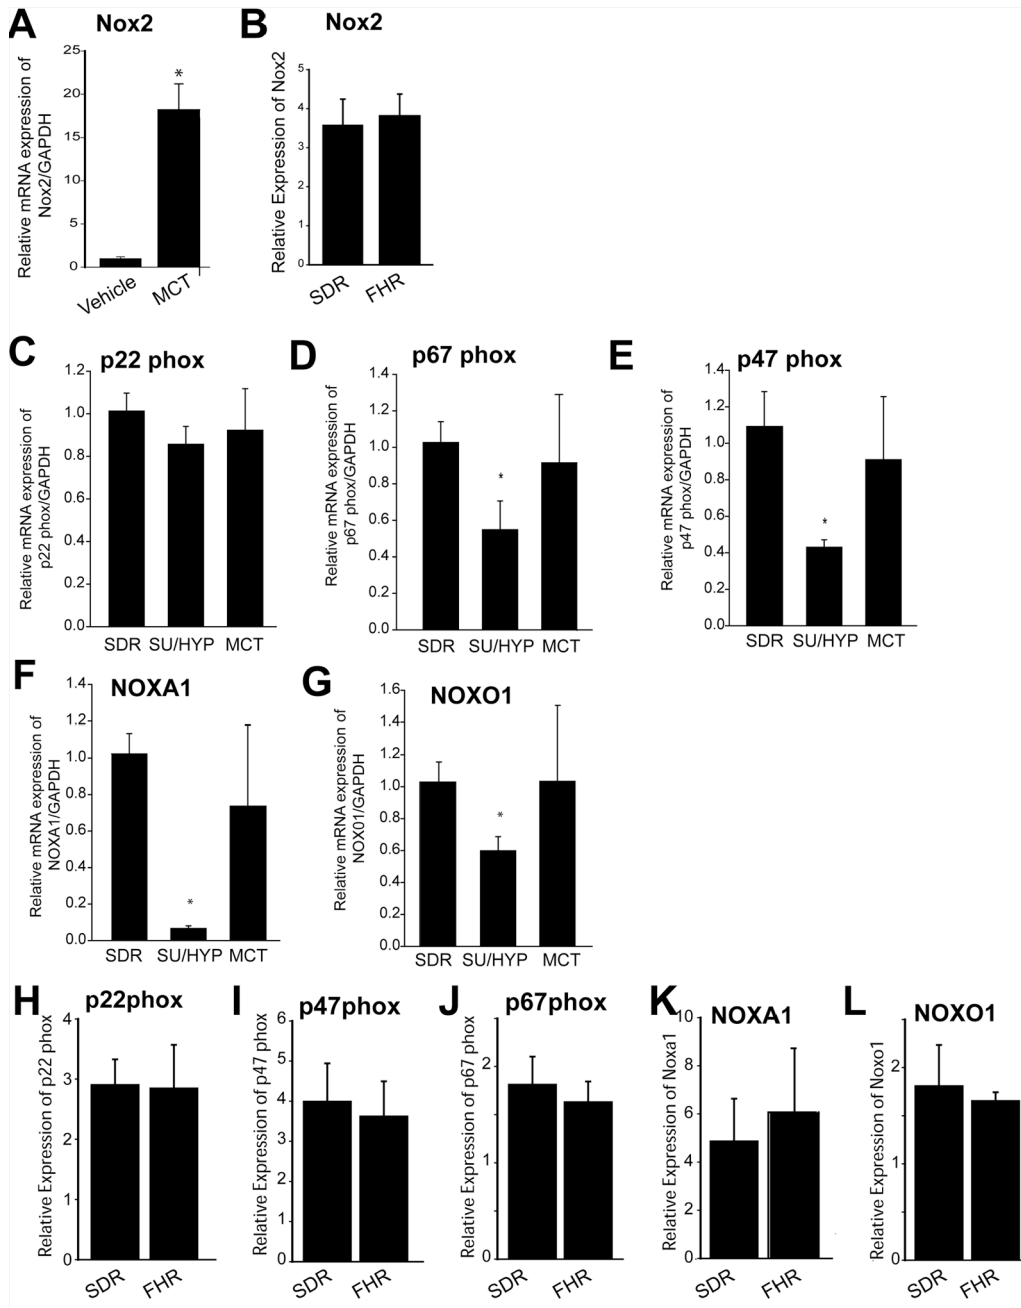

**Supplemental Figure II. Relative expression of Nox2 and Nox subunits in isolated pulmonary arteries (PA) from rats with pulmonary hypertension.** Nox2 mRNA (measured by qRT-PCR ( $\Delta\Delta C_t$ ) normalized to GAPDH) is significantly increased in PA from MCT-treated rats (4week; **A**) and unchanged in FHR rats (24 week; **B**). Expression levels of p22phox (**C**), p67phox (**D**), and p67phox (**E**) and NOXA1 (**F**) and NOXO1 (**G**) in PA from normotensive (SDR), SUGEN/hypoxia (SU/HYP; 14week) and MCT-treated (4week) hypertensive rats. Expression levels of p22phox (**H**), p47phox (**I**), and p67phox (**J**) and NOXA1 (**K**) and NOXO1 (**L**) in PA from normotensive (SDR) and 24 week FHR. \* Significantly different from SDR/ vehicle controls,  $p < 0.05$  ( $n = 5-6$ ).

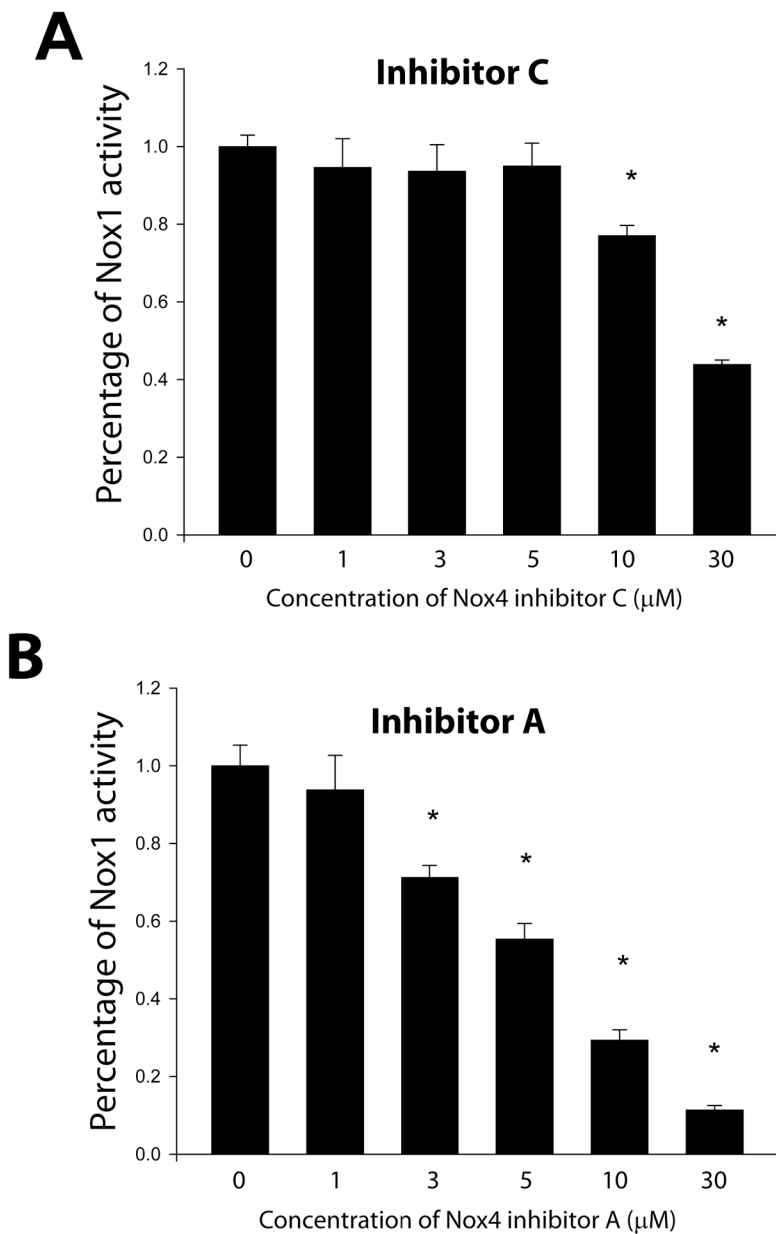

**Supplemental Figure III. Relative potency of Nox4 inhibitor A (VCC588646) and C (VCC202273) against ROS production in cells expression Nox1.** HEK293 cells expressing Nox1, NOXO1, NOXA1 were exposed to the indicated concentrations of inhibitor VCC202273 (C) and VCC588646 (A) (A-B) for 1h and the Nox1-dependent production of reactive oxygen species determined by L-012 chemiluminescence. \* Significantly different from Vehicle  $p < 0.05$  (n = 7).

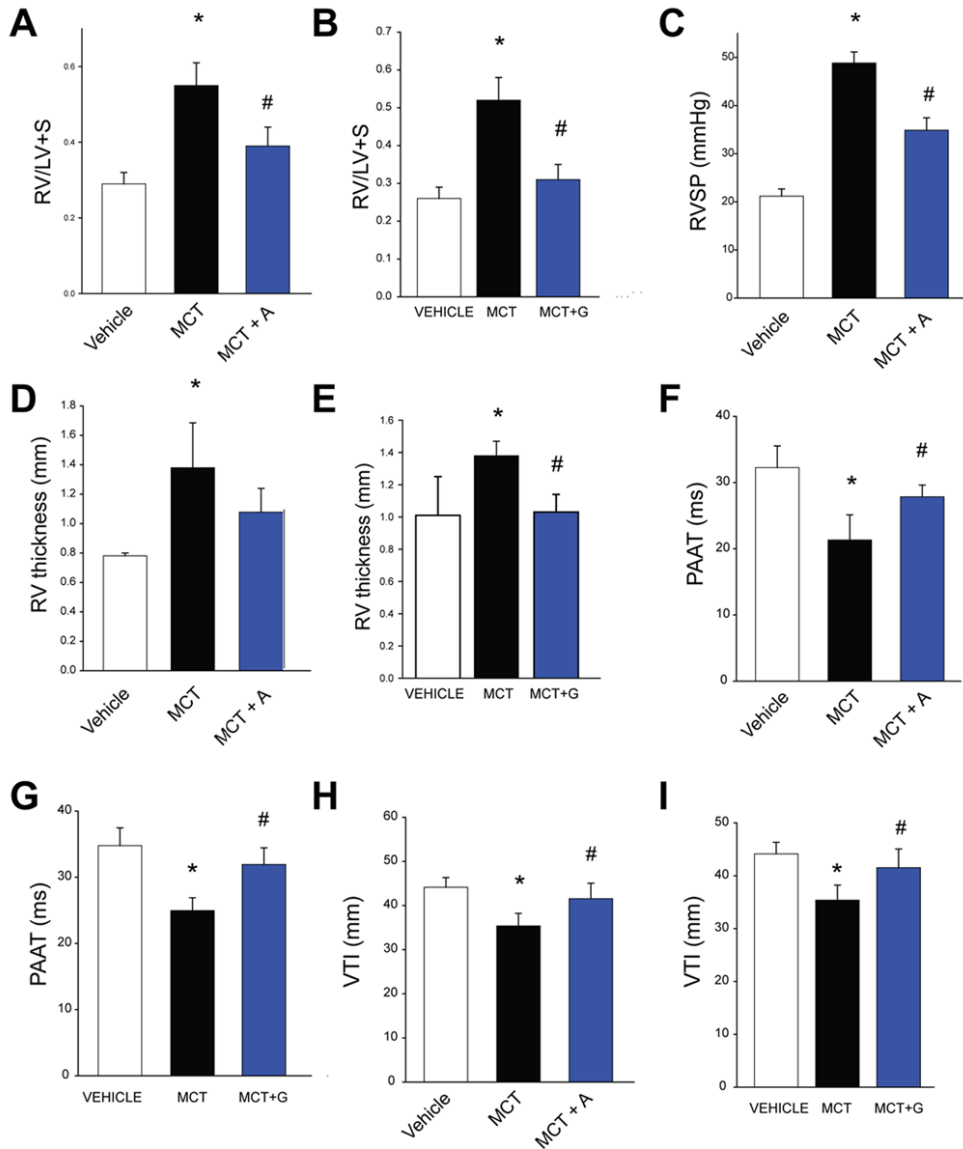

**Supplemental Figure IV. Effect of Nox4 inhibition on cardiac remodeling and indices of cardiopulmonary function in MCT-treated rats.** MCT-treatment significantly increases right ventricular (RV) hypertrophy as measured by the increased Fulton Index (RV/LV+S; **A-B**), right ventricular systolic pressure (RVSP; **C**) and right ventricle (RV) thickness (**D-E**). These variables are decreased in rats treated with the Nox4 inhibitors VCC588646 (A) (**A, C, D**) and GKT136901 (G) (**B, E**). MCT-treatment significantly decreased pulmonary artery acceleration time (PAAT; **F, G**), velocity time integral (VTI; **H, I**) and these were increased with Nox4 inhibitor VCC588646 (A) and also with GKT136901 (G) (**F-I**). \* Significantly different from Vehicle, # significantly different from MCT,  $p < 0.05$  ( $n = 5-6$ ).

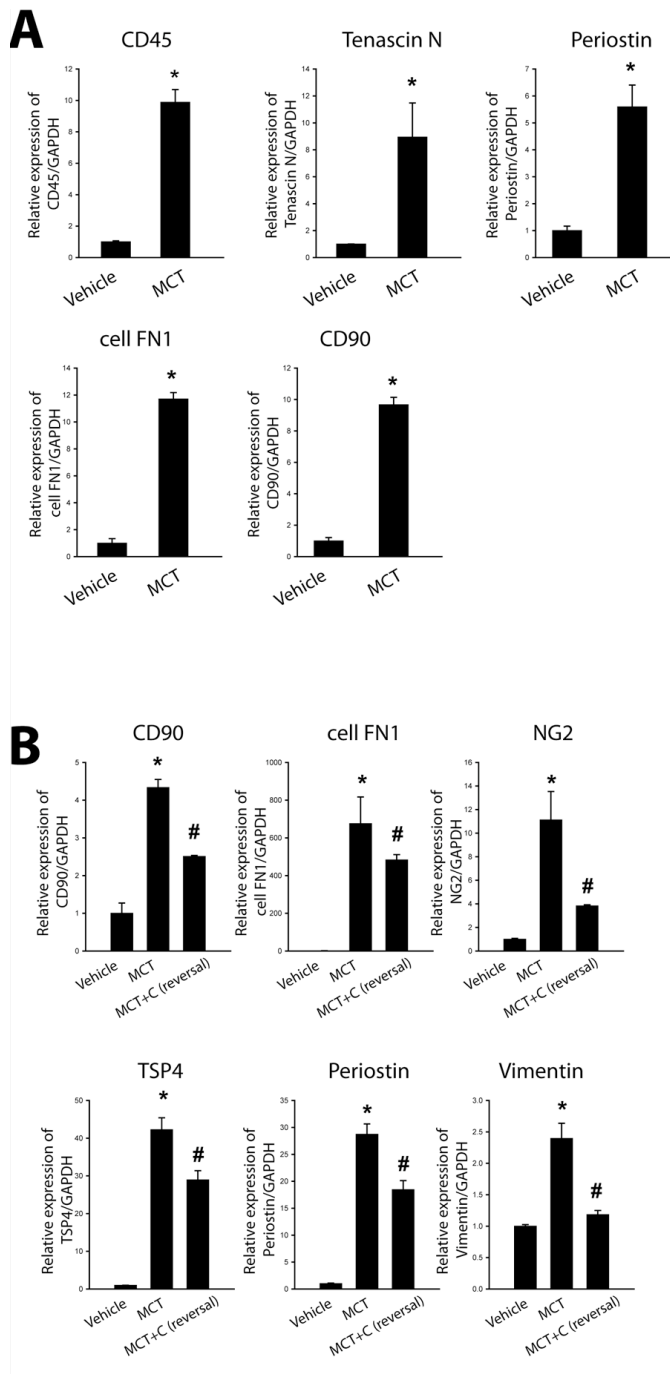

**Supplemental Figure V. Densitometric analysis of changes in gene expression in hypertensive PA and reversal by Nox4 inhibition.** Analysis of selected markers of inflammatory cells and fibroblasts in PA isolated from control and hypertensive (MCT-treated) rats (CD45, CD90, cellFN1, periostin, tenascin N, and vimentin) (A). Expression of markers of fibroblasts in PA isolated from MCT-treated rats in the presence and absence of the Nox4 inhibitor VCC202273 (C) in a reversal protocol (see Methods) (B). (cell FN1 = cellular fibronectin, TSP4 = thrombospondin-4; NG2 = chondroitin sulfate proteoglycan/ Cspg4) \* Significantly different from Vehicle, # significantly different from MCT,  $p < 0.05$  ( $n = 3-4$ ).

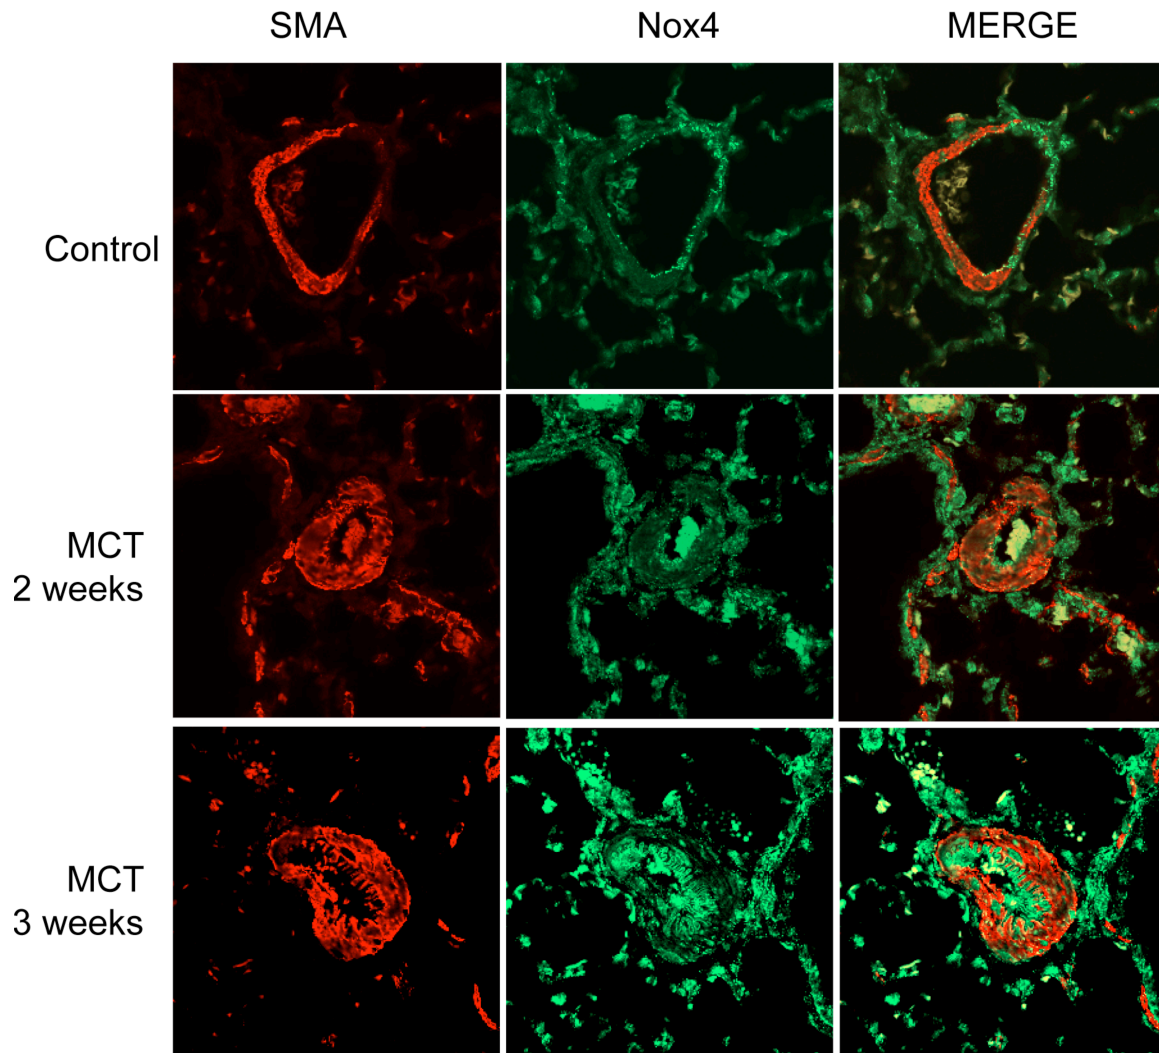

**Supplemental Figure VI. Time course of Nox4 expression in PA from MCT-treated rats.** Confocal images of lung sections from control, and experimental PH (2-week; 3-week MCT). Sections were stained with Nox4 and  $\alpha$ -actin antibodies (SMA).

## Control Human Lung

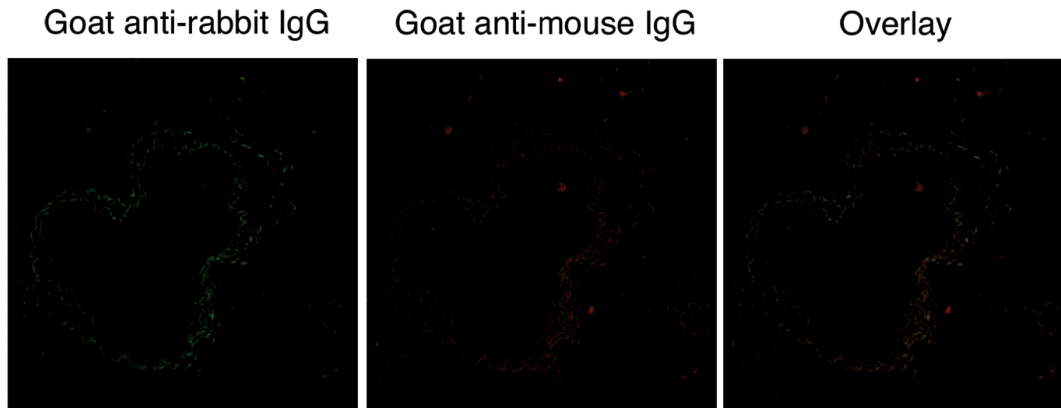

**Supplemental Figure VII.** Confocal imaging of IgG staining of human lung sections. Sections were stained first with non-immune rabbit IgG and non-immune mouse IgG and then with goat anti-rabbit IgG and goat anti-mouse IgG.
